# Supplementary material
Source: HighWire-hosted journal article supplement (https://www.cmajopen.ca/highwire/filestream/85274/field_highwire_adjunct_files/7/2020-0049-original-submission.pdf)
Supplement: 2020-0049-original-submission.pdf [file 2020-0049-original-submission.pdf]

1  
2  
3  
4  
5  
6  
7  
8  
9  
10  
11  
12  
13  
14  
15  
16  
17  
18  
19  
20  
21  
22  
23  
24  
25  
26  
27  
28  
29  
30  
31  
32  
33  
34  
35  
36  
37  
38  
39  
40  
41  
42  
43  
44  
45  
46  
47  
48  
49  
50  
51  
52  
53  
54  
55  
56  
57  
58  
59  
60

1 **Title:** “I felt like it was someone’s mother scolding me”: A mixed methods study of the  
2 sexual and reproductive health service experiences of young adult sex workers in Toronto  
3  
4

5 **Abstract:**  
6

7 *Background:* Young adult sex workers (YASW) may be particularly likely to benefit  
8 from sexual and reproductive health services due to risks associated with their work;  
9 however, little research has examined their experiences accessing such services. This  
10 study therefore aimed to assess barriers and facilitators to sexual and reproductive health  
11 services among YASW in Toronto.

12 *Methods:* This was a community-based, mixed methods study of 71 young adults (aged  
13 18-29) who were currently or had previously been engaged in sex work. Participants  
14 completed an online survey (n=54) or participated in a focus group or interview (n=17).  
15 Quantitative data were summarized using descriptive statistics and qualitative themes  
16 identified using thematic analysis.

17 *Results:* Survey participants reported suboptimal access to sexual and reproductive health  
18 care, with 14.8% reporting no regular source of care and only 11.1% reporting that they  
19 disclose their sex work experience to providers. Across both qualitative and quantitative  
20 data, actual or anticipated sex work stigma from health care providers was the dominant  
21 barrier to care, while access to non-judgmental providers, and particularly those who  
22 themselves have sex work experience, was identified as a key facilitator.

23 *Interpretation:* YASW face many barriers to accessing sexual and reproductive health  
24 services which require attention at both the provider (i.e., anti-stigma interventions) and  
25 health systems (i.e., availability of anonymous services outside of regular business hours)  
26 levels. Including those with sex work experience in the development of such  
27 interventions will likely maximize their capacity to address the needs of this under-served  
28 population.  
29

30 **Introduction:**  
31

32 Engagement in sex work (that is, the exchange of sexual services for money,  
33 services or goods) is associated with higher chance of contact with sexually transmitted  
34 and blood borne infections (STBBI) including HIV, both in Canada and globally.<sup>1,2</sup>  
35 Indeed, UNAIDS reports that on a global scale, sex workers are 21 times more likely than  
36 members of the general adult population to acquire HIV.<sup>2</sup> While participation in sex with  
37 multiple partners, exposure to sexual violence, intravenous drug use and unstable living  
38 and criminalized working environments are contributors to this elevated risk for some sex  
39 workers, stigma in healthcare settings also contributes to inadequate access to health  
40 services, including sexual health services (e.g. reduced uptake of HIV and STBBI testing)  
41 that can also elevate HIV vulnerabilities.<sup>1</sup> For example, in a study of over 200 sex  
42 workers in five Canadian metropolitan areas, in comparison with the general Canadian  
43 population, sex workers reported almost three times the rate of unmet health care needs.<sup>3</sup>  
44 Although sex workers in this and other studies have reported a variety of reasons for not  
45 seeking health care, stigma associated with sex work appears to be a primary barrier.<sup>4</sup>

1  
2  
3 46 Young adults (aged 18 to 29) who engage in sex work appear to be particularly at-  
4 47 risk for HIV, other STBBI, and associated risk factors.<sup>5</sup> For example, one Canadian study  
5 48 indicated that sex working youth are more likely than their adult counterparts to be  
6 49 homeless, to inject heroin daily, and to service clients in public places.<sup>6</sup> Another study  
7 50 found that male young adult sex workers (YASW) were more likely to engage in sexual  
8 51 practices that elevate HIV and STBBI exposure relative to their street-involved  
9 52 counterparts who did not engage in sex work.<sup>7</sup> These risks, particularly among youth, are  
10 53 a significant concern, given the well established long term health impacts of untreated  
11 54 STBBI.<sup>8-10</sup>

12  
13  
14 55 These studies suggest that YASW are likely to have significant need for sexual  
15 56 and reproductive health services; despite this, little is known about Canadian YASW's  
16 57 experiences accessing sexual and reproductive health services. In a recent local needs  
17 58 assessment of the sexual health service experiences of youth in Toronto conducted by  
18 59 Planned Parenthood Toronto, respondents who reported experience with sex work were  
19 60 more likely than other youth to report unmet sexual health needs and to lack access to  
20 61 sexual health information and services (PPT, 2016). Yet the sample size of sex working  
21 62 youth in this study was small (n=19), calling for additional investigation to examine  
22 63 YASW's sexual health needs. Thus, the current study was developed by Planned  
23 64 Parenthood Toronto and researchers at the University of Toronto with the objectives to a)  
24 65 identify barriers and facilitators to sexual and reproductive health service access for  
25 66 YASW in Toronto, and b) generate recommendations to improve access to health care for  
26 67 this population.  
27  
28 68

## 69 **Methods:**

30  
31 70 This research was carried out in Toronto, Ontario Canada, given that the  
32 71 preliminary research identifying the need for this work was Toronto-centred. However,  
33 72 Toronto is an appropriate setting for research on sex work given that surprisingly little  
34 73 research has been conducted with sex workers in Toronto, despite being Canada's most  
35 74 populous city.<sup>11</sup> The study employed a community-based participatory research design  
36 75 wherein the study was designed and carried out in its entirety in close collaboration with  
37 76 individuals who had lived experience of sex work, as facilitated through a partnership  
38 77 with Maggie's: Toronto Sex Workers' Action Project.<sup>12</sup> The study was also guided by a  
39 78 committee of four youth with lived experience of sex work who consulted with the  
40 79 research team at key stages (e.g., in developing the data collection tools, to reduce  
41 80 measurement bias; and in early stages of data interpretation, to maximize credibility of  
42 81 findings). The study further drew from a transformative mixed methods study design  
43 82 wherein both qualitative (thematic analysis) and quantitative (cross-sectional survey)  
44 83 methods were used with an explicit social justice aim (to improve health service access  
45 84 for YASW).<sup>13</sup> Although the research objectives were best addressed using qualitative  
46 85 methods, study partners identified that participation in focus groups or interviews may  
47 86 involve more identity disclosure than some YASW would be comfortable with. Thus, in  
48 87 order to reduce selection bias, interested individuals were provided with the option of  
49 88 participating in a single 1.5-2 hour semi-structured focus group, 1-1.5 hour semi-  
50 89 structured individual interview, or anonymous online survey administered using the  
51 90 application Qualtrics, all of which included parallel questions regarding barriers and  
52 91 facilitators to health service access and recommendations for improvement (data  
53  
54  
55  
56  
57  
58  
59  
60

1  
2  
3  
4  
5  
6  
7  
8  
9  
10  
11  
12  
13  
14  
15  
16  
17  
18  
19  
20  
21  
22  
23  
24  
25  
26  
27  
28  
29  
30  
31  
32  
33  
34  
35  
36  
37  
38  
39  
40  
41  
42  
43  
44  
45  
46  
47  
48  
49  
50  
51  
52  
53  
54  
55  
56  
57  
58  
59  
60

92 collection tools available upon request). Both the qualitative interview guide and the  
93 quantitative survey were pilot tested with the advisory committee. Prior to beginning the  
94 focus group or interview, participants provided verbal consent to participate, completed a  
95 demographic questionnaire, and received a cash honorarium. Survey participants were  
96 required to tick a box indicating their consent to participate prior to proceeding to the  
97 survey questions. No honorarium was provided for survey participation.

98 Eligible participants were young adults (aged 18-29) who had previously or were  
99 currently engaged in sex work, as defined above. Recruitment was via convenience  
100 sampling, predominantly through the online networks of the study partners and youth  
101 advisory committee members; hard copy recruitment flyers were also posted at locations  
102 likely to be frequented by sex workers. Recruitment materials instructed interested  
103 participants to contact the research coordinator for more information (qualitative strand)  
104 or visit the study webpage to complete the online survey (quantitative strand). After  
105 receiving information from the research coordinator, no individuals refused to participate  
106 and none withdrew after providing consent, although some did not ultimately attend the  
107 focus groups/interviews for scheduling or other reasons. Fourteen individuals participated  
108 in focus groups and three individuals in interviews for a total of 17 participants in the  
109 qualitative strand; this sample size was somewhat less than our *a priori* intended sample  
110 size of 24 participants in the qualitative strand.

111 Interviews and focus groups were conducted between October-December 2017 by  
112 a female member of the research team who held a graduate degree, had lived experience  
113 as a sex worker, had been involved in community activism with the sex work community,  
114 and had previous experience conducting qualitative research interviews with sex workers.  
115 Only one of the qualitative participants was known to the interviewer prior to the study.  
116 In the interviews and focus groups, the interviewer introduced herself as a graduate  
117 student who had been extensively involved with sex working communities, and disclosed  
118 her own personal sex work experience only if it came up organically in the course of the  
119 interview/focus group. Focus groups and interviews were conducted at one of the  
120 community partner agencies, a university office, or the participant's home, and no one  
121 other than the interviewer and participants were present. Following each  
122 interviewer/focus group, the interviewer recorded brief field notes that mostly pertained  
123 to the interview guide (recommended changes to wording, order of questions, etc.)

124 The survey was open between January-March 2018, and the target sample size  
125 was the maximum number of participants who could be recruited during this period. A  
126 total of 112 respondents accessed the survey; 54 met the screening criteria and provided  
127 sufficient data for analysis. Participant demographics are provided in Table 1.

128 Interviews and focus groups were audiorecorded and transcribed verbatim.  
129 Participants did not have an opportunity to review transcripts given that our research  
130 ethics protocol required that participant contact information be destroyed immediately  
131 following data collection. All members of the research team independently coded the first  
132 two transcripts to develop a preliminary coding framework which incorporated both  
133 themes determined in advance (e.g., barriers and facilitators) and themes derived from the  
134 data (e.g., provider stigma). The coding framework is available upon request. Subsequent  
135 transcripts were coded independently by the interviewer and one other member of the  
136 research team using an iterative thematic analysis approach (coding framework available  
137 upon request).<sup>14</sup> NVivo software was used to assist with data management. Although for

1  
2  
3 138 feasibility reasons data collection and analysis were not iterative in this study, data  
4 139 saturation was achieved with respect to the primary themes related to barriers and  
5 140 facilitators to accessing sexual and reproductive health services, and these findings were  
6 141 also triangulated with the quantitative data. Quantitative survey data were exported into  
7 142 SPSS for analysis, which entailed computing descriptive statistics and proportions for the  
8 143 outcome variables of interest (barriers and facilitators to sexual and reproductive health  
9 144 service access) on the basis of our exposure variable (current or past engagement in sex  
10 145 work between the ages of 18-29). Given the mixed methods design of this study, both the  
11 146 STROBE cross-sectional reporting guidelines<sup>15</sup> and the Consolidated criteria for  
12 147 reporting qualitative research checklist<sup>16</sup> were used in the preparation of this manuscript.  
13  
14  
15

## 16 149 **Results:**

### 17 150 ***Quantitative Findings***

18 151 With respect to access to sexual and reproductive health care, 20 (37.0%) of  
19 152 survey participants reported usually seeing a family doctor for sexual and reproductive  
20 153 health care; other sources of health care included clinics (n=28, 51.9%) and community  
21 154 health centres (n=24, 44.4%), while 8 participants (14.8%) reported not having a regular  
22 155 source of health care. Only 6 (11.1%) survey participants reported that they disclose their  
23 156 involvement in sex work to health care providers, while equal numbers (n=24, 44.4%)  
24 157 reported that they sometimes or never disclose. Less than one third (n=17, 31.5%) agreed  
25 158 or strongly agreed that they had access to all of the sexual and reproductive health  
26 159 services and programs they needed. The majority of survey participants (n=32, 66.7%)  
27 160 reported having had bad experiences with health services that made them not want to go  
28  
29 161 back.  
30

31 162 Data regarding barriers and facilitators to accessing sexual health services for  
32 163 survey participants are provided in Table 2. The most commonly reported barriers to  
33 164 access were believing that health care providers judged sex workers (33, 61.1%),  
34 165 concerns about anonymity or confidentiality (33, 61.1%) and believing that health care  
35 166 providers will be uninformed/underinformed about sex work (32, 59.3%). When asked  
36 167 what would make them more likely to access sexual or reproductive health services,  
37 168 facilitators included staff and volunteers with sex work experience (41, 75.9%), non-  
38 169 judgmental staff/volunteers (38, 70.4%), and an anti-oppressive space (38, 70.4%).  
39  
40

### 41 171 42 172 ***Qualitative Findings***

43 173 These findings were echoed in the qualitative data (please refer to illustrative  
44 174 quotes in Table 3). Participants in focus groups and interviews described actual or  
45 175 anticipated stigma from health care providers as the primary barrier to have their sexual  
46 176 and reproductive health service needs met. This stigma manifested in a variety of ways,  
47 177 including condescending treatment, refusal to believe or take seriously participants' self-  
48 178 reported sexual and needs, and efforts to convince participants to leave sex work without  
49 179 any discussion or acknowledgement of the complexities of their individual sex work  
50 180 experiences. Other barriers identified by interview and focus group participants included  
51 181 costs associated with desired interventions (e.g., HPV vaccination), clinic forms and  
52 182 procedures that do not account for the realities of sex work, and intersecting forms of  
53  
54  
55  
56  
57  
58  
59  
60

1  
2  
3 183 stigma (particularly ageism, sexism and ableism associated with psychiatric diagnoses  
4 184 participants had received).

5 185 Key facilitators to sexual and reproductive health service access also echoed the  
6 186 quantitative data: respectful, non-judgmental service providers to whom they felt they  
7 187 could disclose their sex work experience, access to services that are free and/or  
8 188 anonymous, and personal characteristics that they could leverage in health care  
9 189 encounters (e.g., assertiveness, knowledge of their own bodies) were described as  
10 190 primary service access facilitators.

11  
12 191

### 13 192 ***Mixed Methods Findings***

14  
15 193 When asked for their specific recommendations to improve sexual and  
16 194 reproductive health service access for YASW, data from participants in the quantitative  
17 195 and qualitative strands of the study generated seven recommendations (Table 4). These  
18 196 recommendations collectively address barriers/facilitators identified at the provider level  
19 197 (e.g., adopting a non-judgmental approach to working with sex workers) and  
20 198 barriers/facilitators at the system or service level (e.g., recruiting staff/volunteers with sex  
21 199 work experience).

22 200

### 23 201 **Interpretation:**

24 202 This community-based research study has identified that YASW in the Toronto  
25 203 area have suboptimal access to sexual and reproductive health services, with only 37% of  
26 204 survey participants reporting a family physician who provided this care. Further, YASW  
27 205 are likely to receive suboptimal quality of care, given their actual and anticipated  
28 206 experiences of provider stigma, which in turn are associated with very low levels of  
29 207 disclosure of their sex work experience. For many participants in this study, experiences  
30 208 with provider stigma regarding sex work led them to conclude that disclosure of their  
31 209 experience would do more harm than good with respect to being able to have their sexual  
32 210 and reproductive health needs met.

33 211 Our findings align with previous research literature that has identified poor access  
34 212 to health and social services among sex workers both in Canada and elsewhere and  
35 213 extends this literature to include YASW in particular.<sup>4,17,18</sup> Our results further align with  
36 214 prior research identifying provider stigma associated with sex work as a primary barrier  
37 215 to health care access for this population; again, our study extends prior literature to  
38 216 establish institutionalized stigma as a primary barrier to service access for YASW in  
39 217 particular.<sup>4,19</sup>

40 218 Our finding that providers' perceived stigma and lack of knowledge about sex  
41 219 work are primary barriers to sexual and reproductive health service access for this  
42 220 population suggests that provider education and training – including stigma reduction -  
43 221 and subsequently communication to the sex work community about improved provider  
44 222 competency, could be important mechanisms to improve access. We were unable to  
45 223 identify any research initiatives to assess inclusion of sex-work related content in medical  
46 224 curricula. Research from the provider's perspective will be necessary to identify specific  
47 225 gaps to be addressed by these initiatives, as well as to determine the best timing (e.g.,  
48 226 during training or as continuing education) and forum (e.g., didactic or arts-based, among  
49 227 others). Given our study has identified involvement of individuals with sex work

1  
2  
3 228 experience as a primary facilitator to service access, involving the sex work community  
4 229 in the development and delivery of these interventions will be important.

5 230 Some limitations should be noted in interpreting this study's findings. First, given  
6 231 that this study was driven by local needs, it included only those YASW who lived or  
7 232 worked in the Toronto area, and thus does not capture the experiences of those working  
8 233 in other settings where both sex work and health care access may operate differently,  
9 234 particularly more rural and remote settings. Additional research will be needed to  
10 235 understand the health service experiences of these YASW. Further, our study had limited  
11 236 inclusion of outdoor sex workers. Although representative data are difficult to collect due  
12 237 to the hidden and criminalized nature of sex work, one widely cited 2006 federal  
13 238 government report suggested that only 20% of sex workers work outdoors.<sup>20</sup> This  
14 239 proportion may have since decreased due to the growth of online sex work.<sup>21</sup> However,  
15 240 the online nature of our survey, primary recruitment and screening methods, and timing  
16 241 of our study (collecting data during the winter months) may have contributed to under-  
17 242 representation of outdoor sex workers, who may have different sexual and reproductive  
18 243 health care needs and experiences.

19 244 Despite these limitations, our study offers insights into the sexual and  
20 245 reproductive service experiences of YASW, and suggests that interventions to address  
21 246 provider knowledge and attitudes regarding sex work are necessary. Future research is  
22 247 warranted to explore these and other mechanisms for ensuring equitable sexual and  
23 248 reproductive health service access for those who engage in sex work.

24 249

## 25 250 **Acknowledgements**

26 251 The authors would like to sincerely acknowledge the following individuals who  
27 252 made invaluable contributions to this work: our research participants; our Youth  
28 253 Advisory Committee members, including Antoine Ammiro, Bree Daniels, Jenny Duffy,  
29 254 and Azura Rose; our partners at Maggie's: The Toronto Sex Workers Action Project,  
30 255 including Monica Forrester, Jennifer Porter, and Severin Leal; and Olivia Taylor for  
31 256 editorial assistance with this manuscript. This project was funded by the Women's  
32 257 College Hospital Women's Xchange program. The funders had no role in the collection,  
33 258 analysis, interpretation, or dissemination of the study data.

34 259

35 260

36 261

37 262

38 263

39 264

40 265

41 266

42 267

43 268

44 269

45 270

46 271

47 272

48

49

50

51

52

53

54

55

## 46 265 **References**

- 47 266 1. Canadian Public Health Association (CPHA). Sex work in Canada: a public health  
48 267 perspective. Ottawa (ON): Canadian Public Health Association; 2014. [cited 2019  
49 268 Dec 11]. Available from: [https://www.cpha.ca/sites/default/files/assets/policy/sex-](https://www.cpha.ca/sites/default/files/assets/policy/sex-work_e.pdf)  
50 269 [work\\_e.pdf](https://www.cpha.ca/sites/default/files/assets/policy/sex-work_e.pdf)
- 51 270 2. UNAIDS [Internet]. Geneva: UNAIDS; 2019. UNAIDS welcomes the decision by the  
52 271 Northern Territory of Australia to decriminalize sex work; 2019 [cited 2019 Dec 11];  
53 272

1  
2  
3  
4  
5  
6  
7  
8  
9  
10  
11  
12  
13  
14  
15  
16  
17  
18  
19  
20  
21  
22  
23  
24  
25  
26  
27  
28  
29  
30  
31  
32  
33  
34  
35  
36  
37  
38  
39  
40  
41  
42  
43  
44  
45  
46  
47  
48  
49  
50  
51  
52  
53  
54  
55  
56  
57  
58  
59  
60

- [second story]. Available from: <https://www.unaids.org/en/keywords/sex-workers-and-clients>
3. Benoit C, Ouellet N, Jansson M. Unmet health care needs among sex workers in five census metropolitan areas of Canada. *Can J Public Health*. 2016;107:266.
  4. Lazarus L, Deering KN, Nabess R, Gibson K, Tyndall MW, Shannon K. Occupational stigma as a primary barrier to health care for street-based sex workers in Canada. *Cult Health Sex*. 2012;14(2):139-50.
  5. Shannon K, Bright V, Gibson K, Tyndall MW. Sexual and drug-related vulnerabilities for HIV infection among women engaged in survival sex work in Vancouver, Canada. *Can J Public Health* [Internet]. 2007 [cited 2019 Dec 11];98:465-469. Available from: <https://doi.org/10.1007/BF03405440>
  6. Miller CL, Fielden SJ, Tyndall MW, Zhang R, Gibson K, Shannon K. Individual and structural vulnerability among female youth who exchange sex for survival. *J Adolesc Health*. 2011;49(1):36-41.
  7. Haley N, Roy E, Leclerc P, Bourdeau J-F, Boivin J-F. HIV risk profile of male street youth involved in survival sex. *Sex Transm Infect*. 2004;80(6):526-530.
  8. Workowski K. Centers for disease control and prevention sexually transmitted diseases treatment guidelines. *Clin Infect Dis* [Internet]. 2015 [cited 2019 Dec 11];61(suppl\_8):S759-S762. Available from: <https://doi.org/10.1093/cid/civ771>
  9. World Health Organization (WHO). Global health sectors on sexually transmitted infections 2016-2021 towards ending STIs. Geneva (Switzerland): World Health Organization; 2016. [cited 2019 Dec 11]. Available from: <https://apps.who.int/iris/bitstream/handle/10665/246296/WHO-RHR-16.09-eng.pdf;jsessionid=441D56D16ACB44B0F0D398D9D5D92C47?sequence=1>
  10. World Health Organization (WHO). Sexually transmitted infections (STIs) [Internet]. [place unknown]: World Health Organization; 2019 [cited 2019 Dec 11]. Available from: [https://www.who.int/news-room/fact-sheets/detail/sexually-transmitted-infections-\(stis\)](https://www.who.int/news-room/fact-sheets/detail/sexually-transmitted-infections-(stis))
  11. Benoit C, Smith M, Jansson M, Magnus S, Ouellet N, Atchison C, et al. Lack of confidence in police creates a “Blue Ceiling” for sex workers’ safety. *Can Public Policy*. 2016;42(5):456-468.
  12. Wallerstein N, Duran B, Oetzel JG, Minkler M. Community-based participatory research for health: advancing social and health. 3<sup>rd</sup> ed. San Francisco (US): Jossey-Bass; 2017.

- 1  
2  
3 318 13. Mertens DM. Transformative mixed methods research. *Qual Inq* [Internet]. 2010  
4 319 [cited 2019 Dec 11];16(6):469-474. Available from:  
5 320 <https://doi.org/10.1177/1077800410364612>  
6 321
- 7 322 14. Braun V, Clarke V. Using thematic analysis in psychology. *Qual Res Psychol*  
8 323 [Internet]. 2006 [cited 2019 Dec 11];3(2):77-101. Available from:  
9 324 [10.1191/1478088706qp063oa](https://doi.org/10.1191/1478088706qp063oa)  
10 325
- 11 326 15. Von Elm E, Altman DG, Egger M, Pocock SJ, Gotsche PC, Vandenbroucke JP. The  
12 327 Strengthening the Reporting of Observational Studies in Epidemiology (STROBE)  
13 328 Statement: guidelines for reporting observational studies. *Lancet*. 2007; 370(9596):  
14 329 1453-7. PMID: 18064739.  
15 330
- 16 331 16. Tong A, Sainsbury P, Craig J. Consolidated Criteria for reporting qualitative research  
17 332 (COREQ): a 32-item checklist for interviews and focus groups. *Int J Qual Health*  
18 333 *Care*. 2007;19(6):349-357.  
19 334
- 20 335 17. Bungay V, Kolar K, Thindal S, Remple VP, Johnston CL, Ogilvie G. Community-  
21 336 based HIV and STI prevention in women working in indoor sex markets. *Health*  
22 337 *Promot Pract*. 2013;14(2):247-255.  
23 338
- 24 339 18. Kurtz SP, Surratt HL, Kiley MC, Inciardi JA. Barriers to health and social services  
25 340 for street-based sex workers. *J Health Care Poor Underserved*. 2005;16(2):345-61.  
26 341
- 27 342 19. Logie CH, James L, Tharao W, Loutfy MR. Gender, race, sexual orientation, and sex  
28 343 work: a qualitative study of intersectional stigma experienced by HIV-positive  
29 344 women in Ontario, Canada. *PLoS Med* [Internet]. 2011 [cited 2019 Dec 11]; 8(11):  
30 345 e1001124. Available from: doi:10.1371/journal.pmed.1001124  
31 346
- 32 347 20. Hanger M. The challenge of change: a study of Canada's criminal prostitution laws.  
33 348 Report of the Standing Committee on justice and human rights. Report No.: 6.  
34 349 [Internet]. Ottawa (ON): House of Commons Canada; 2006. [cited 2019 Dec 11].  
35 350 Available from: [https://www.ourcommons.ca/DocumentViewer/en/39-1/JUST/report-](https://www.ourcommons.ca/DocumentViewer/en/39-1/JUST/report-6)  
36 351 [6](https://www.ourcommons.ca/DocumentViewer/en/39-1/JUST/report-6)  
37 352
- 38 353 21. Sanders T, Scoular J, Campbell R, Pitcher J, Cunningham, S. *Internet Sex Work:*  
39 354 *Beyond the Gaze*. Basingstoke (United Kingdom): Palgrave MacMillan; 2018.  
40  
41  
42  
43  
44  
45  
46  
47  
48  
49  
50  
51  
52  
53  
54  
55  
56  
57  
58  
59  
60



1  
2  
3 364  
4 365  
5 366  
6  
7  
8  
9  
10  
11  
12  
13  
14  
15  
16  
17  
18  
19  
20  
21  
22  
23  
24  
25  
26  
27  
28  
29  
30  
31  
32  
33  
34  
35  
36  
37  
38  
39  
40  
41  
42  
43  
44  
45  
46  
47  
48  
49  
50  
51  
52  
53  
54  
55  
56  
57  
58  
59  
60

Confidential

367 **Table 1: Demographic characteristics of participants**  
 368

|                                       | <b>Quantitative Strand<br/>(n=54)</b> | <b>Qualitative Strand<br/>(n=17)</b> | <b>Complete Sample<br/>(n=71)</b> |
|---------------------------------------|---------------------------------------|--------------------------------------|-----------------------------------|
| Mean Age - Current                    | 25.6 <sup>τ</sup><br>Range: 18-29     | 25.7<br>Range: 19-29                 | 20.9<br>Range: 18-29              |
| Mean Age – First sex work involvement | 19.8 <sup>ττ</sup><br>Range: 9-28     | 20.4 <sup>ττ</sup><br>Range: 15-27   | 19.9<br>Range: 9-28               |
| Racial/ethnic identity (%)            |                                       |                                      |                                   |
| White                                 | 32 (59.3%)                            | 15 (83.3%)                           | 47 (66.2%)                        |
| Indigenous                            | 5 (9.3%)                              | 1 (5.6%)                             | 6 (8.5%)                          |
| Black                                 | 4 (7.4%)                              | 0 (0%)                               | 4 (5.6%)                          |
| Another racialized identity*          | 9 (18.0%)                             | 1 (11.1%)                            | 10 (14.1%)                        |
| No response provided                  | 10 (16.7%)                            | 0 (0.0%)                             | 10 (14.1%)                        |
| Gender identity (%)**                 |                                       |                                      |                                   |
| Woman/Female                          | 32 (59.3%)                            | 15 (88.2%)                           | 47 (66.2%)                        |
| Non-binary identity                   | 11 (20.4%)                            | 0 (0%)                               | 11 (15.5%)                        |
| Genderfluid/genderqueer               | 3 (5.6%)                              | 1 (5.9%)                             | 4 (5.6%)                          |
| Trans                                 | 3 (5.6%)                              | 0 (0%)                               | 3 (4.2%)                          |
| Two-spirit                            | 2 (3.7%)                              | 0 (0%)                               | 2 (2.8%)                          |
| Male                                  | 1 (1.9%)                              | 1 (5.9%)                             | 2 (2.8%)                          |
| Femme                                 | 1 (1.9%)                              | 0 (0%)                               | 1 (1.4%)                          |
| No response provided                  | 9 (16.7%)                             | 0 (0%)                               | 9 (12.7%)                         |
| Sexual identity (%)**                 |                                       |                                      |                                   |
| Queer                                 | 17 (31.5%)                            | 7 (41.2%)                            | 24 (33.8%)                        |
| Bisexual                              | 15 (27.8%)                            | 5 (29.4%)                            | 20 (28.2%)                        |
| Straight/heterosexual                 | 9 (16.7%)                             | 4 (23.5%)                            | 13 (18.3%)                        |
| Pansexual                             | 9 (16.7%)                             | 1 (5.9%)                             | 10 (14.1%)                        |
| Questioning                           | 3 (5.6%)                              | 0 (0%)                               | 3 (4.2%)                          |
| Two-spirit                            | 2 (3.7%)                              | 1 (5.9%)                             | 3 (4.2%)                          |
| Another identity***                   | 11 (20.4%)                            | 0 (0%)                               | 11 (15.5%)                        |
| No response provided                  | 9 (16.7%)                             | 0 (0%)                               | 9 (12.7%)                         |
| Sex work experience (%)**             |                                       |                                      |                                   |
| Agency escort                         | 25 (46.3%)                            | 7 (41.2%)                            | 32 (45.1%)                        |
| Fetish                                | 14 (25.9%)                            | 4 (23.5%)                            | 18 (25.4%)                        |
| Independent escort                    | 35 (64.8%)                            | 8 (47.1%)                            | 43 (60.6%)                        |
| Massage parlor attendant              | 10 (18.5%)                            | 1 (5.9%)                             | 11 (15.5%)                        |

|                        |            |            |            |
|------------------------|------------|------------|------------|
| Outdoor worker         | 2 (3.7%)   | 1 (5.9%)   | 3 (4.2%)   |
| Pornography actor      | 12 (22.2%) | 4 (23.5%)  | 16 (22.5)  |
| Stripper/exotic dancer | 6 (11.1%)  | 4 (23.5%)  | 10 (14.1%) |
| Sugar baby             | 17 (31.5%) | 12 (70.6%) | 29 (40.1%) |
| Survival sex           | 11 (20.4%) | 5 (29.4%)  | 16 (22.5%) |
| Webcam host            | 22 (40.7%) | 5 (29.4%)  | 27 (38.0%) |
| Other type of sex work | 1 (1.9%)   | 1 (5.9%)   | 2 (2.8%)   |

369 \* Includes: Arab, East Asian, South Asian, Mixed Race, Latin

370 \*\*Participants could check all options that applied so percentages do not add up to 100%.

371 \*\*\* Includes: Demisexual, gay, lesbian, woman who has sex with women, another sexual  
372 identity (no details provided)

373 <sup>†</sup> 12 participants did not provide data on this variable, although all answered the eligibility  
374 question indicating they were aged 18-29 years

375 <sup>††</sup> One participant did not provide data on this variable

376 <sup>†††</sup> Ten participants did not provide data on this variable

Confidential

377 **Table 2: Most frequent participant-reported barriers and facilitators to accessing**  
 378 **sexual and reproductive health care among survey participants\***  
 379

|             |                                                                                                         | <b>Participants Reporting<br/>(n, %, 95% CI)</b> |
|-------------|---------------------------------------------------------------------------------------------------------|--------------------------------------------------|
| Barrier     | I think health care providers judge sex workers                                                         | 33 (62.3; 48.8-74.1)                             |
|             | I am concerned about my anonymity/confidentiality                                                       | 33 (62.3; 48.8-74.1)                             |
|             | I think health care providers are uninformed about sex workers                                          | 32 (60.4; 46.9-72.4)                             |
|             | I feel emotional distress, depression or anxiety                                                        | 29 (54.7; 41.4-67.4)                             |
|             | The cost of things I need for my sexual health, like birth control, condoms, or other prescriptions     | 28 (52.8; 39.7-65.6)                             |
|             | I am worried about my friends or family finding out                                                     | 27 (50.9; 37.9-63.9)                             |
| Facilitator | Staff and/or volunteers who have sex work experience                                                    | 41 (78.9; 65.8-87.9)                             |
|             | Non-judgmental staff and/or volunteers                                                                  | 38 (73.1; 59.7-83.3)                             |
|             | Anti-oppressive space                                                                                   | 38 (73.1; 59.7-83.3)                             |
|             | Knowing that I will not be reported to the police, social worker, or CAS for my involvement in sex work | 32 (61.5; 47.9-73.6)                             |
|             | Staff and/or volunteers who are similar to me (e.g., age, gender identity, sexual identity, race)       | 25 (48.1; 35.1-61.3)                             |
|             | Convenient location                                                                                     | 20 (38.5; 26.5-52.1)                             |

380 \*53 participants endorsed at least one barrier, and 52 participants endorsed at least one  
 381 facilitator.  
 382

1  
2  
3  
4  
5  
6  
7  
8  
9  
10  
11  
12  
13  
14  
15  
16  
17  
18  
19  
20  
21  
22  
23  
24  
25  
26  
27  
28  
29  
30  
31  
32  
33  
34  
35  
36  
37  
38  
39  
40  
41  
42  
43  
44  
45  
46  
47

**Table 3: Illustrative quotations from qualitative data analysis**

| Theme                                                         | Sub-theme                   | Illustrative Quotations                                                                                                                                                                                                                                                                                                                                                      |
|---------------------------------------------------------------|-----------------------------|------------------------------------------------------------------------------------------------------------------------------------------------------------------------------------------------------------------------------------------------------------------------------------------------------------------------------------------------------------------------------|
| Barriers to accessing sexual and reproductive health services | Provider stigma             | <p>Interviewer: What was it like [when you disclosed your sex work experience]?</p> <p>Participant: Incredibly aggravating, frustrating, offensive. I felt like it was someone’s mother scolding me. I felt incredibly judged...I didn’t seem to matter. So when I had questions they were very vague and unresponsive. Almost like I wasn’t even there. (Focus Group 4)</p> |
|                                                               | Cost of interventions       | <p>I did get my first round of HPV shots last week. It was disgustingly expensive. I had to pay about \$215...I called several health outlets, and all of them were like, no, unless you’re a student in high school or you have some sort of coverage as a post-secondary student [you have to pay out of pocket]. (Focus Group 3)</p>                                      |
|                                                               | Clinic forms and procedures | <p>I try to get tested every three months. And there have been times and different facilities, particularly the [sexual health clinic], where they seem to be a little critical of coming so frequently, and they ask why. Which feels like a bit of a judgement, when I’m having as much as I’m having. But I’ve stopped going there as a result. (Interview 3)</p>         |
|                                                               | Intersecting stigmas        | <p>I never actually told any doctor that I’ve spoken to that I’m a sex worker for many, many reasons. Including the fact that I live with PTSD, and the minute you tell somebody that you’re somebody who suffers from PTSD, and that you’re a sex worker, you can no longer make decisions for yourself as an adult in the medical community. (Focus Group 3)</p>           |

|                                                                      |                                                     |                                                                                                                                                                                                                                                                                                                                                                                                                                                                                                                                                                                                                                                                                                                                                                                                                                                                                  |
|----------------------------------------------------------------------|-----------------------------------------------------|----------------------------------------------------------------------------------------------------------------------------------------------------------------------------------------------------------------------------------------------------------------------------------------------------------------------------------------------------------------------------------------------------------------------------------------------------------------------------------------------------------------------------------------------------------------------------------------------------------------------------------------------------------------------------------------------------------------------------------------------------------------------------------------------------------------------------------------------------------------------------------|
| <p>Facilitators of sexual and reproductive health service access</p> | <p>Respectful, non-judgmental service providers</p> | <p>Interviewer: Could you explain what made [the service encounter] a positive experience, if you can recall how the person responded, or what made you feel comfortable telling them [about your sex work experience] in the first place?</p> <p>Participant: Just right off the bat, just like the tone was very calm and welcoming, so I knew that there was never any hostility in terms of the environment and initial responses. It just felt very casual, like I would just say, ‘oh I’m a sex worker, this is how many partners I’ve had’, like, while we’re doing testing and stuff, just so they could learn my history. But it was just a lot of like, ‘oh I see’, nodding, asking if I was being safe, like the precautionary questions that they have to tell everyone. But yeah I think the tone was the biggest factor, and facial expressions. (Interview 1)</p> |
|                                                                      | <p>Access to free, anonymous services</p>           | <p>I know [service], which for homeless youth, there’s free doctors. You don’t have to show ID...that’s where I was most comfortable going to get tested, rather than going to my family doctor. So things like those – walk in, where you know the doctor’s there from 1 to 4, and you can, they don’t really know who you are. I think that you’re more inclined to be honest [about sex work experience] because they don’t know who you are, but you’re getting the treatment that you need, if you need treatment. And you don’t feel as judged, I guess. (Focus Group 1)</p>                                                                                                                                                                                                                                                                                               |
|                                                                      | <p>Personal characteristics</p>                     | <p>Once they [health care provider] speak to me for a couple of minutes, any sort of stigma that they probably typically have and would hold onto in other situations subsides. So I am fully aware of that privilege. I think that’s exactly what it is. And I’ve even had friends that have come over here, from Russia</p>                                                                                                                                                                                                                                                                                                                                                                                                                                                                                                                                                    |

1  
2  
3  
4  
5  
6  
7  
8  
9  
10  
11  
12  
13  
14  
15  
16  
17  
18  
19  
20  
21  
22  
23  
24  
25  
26  
27  
28  
29  
30  
31  
32  
33  
34  
35  
36  
37  
38  
39  
40  
41  
42  
43  
44  
45  
46  
47

|  |  |                                                                                                                                                                                                                                                                                                                                                                                                                                                                                                                                                                               |
|--|--|-------------------------------------------------------------------------------------------------------------------------------------------------------------------------------------------------------------------------------------------------------------------------------------------------------------------------------------------------------------------------------------------------------------------------------------------------------------------------------------------------------------------------------------------------------------------------------|
|  |  | <p>and the Ukraine, that fall into [sex work] because they're just trying to get things in order for themselves and can't qualify for other jobs. They themselves who are highly educated, much more than I am, they deal with attitude when they see a doctor, and it can be the same person who I saw maybe two days before and had a wonderful experience with...I think that I'm lucky in a way, like I can be very assertive and I'm never shunned. But if I were not who I am...I'd have a very different outcome. I don't doubt that for a second. (Focus group 3)</p> |
|--|--|-------------------------------------------------------------------------------------------------------------------------------------------------------------------------------------------------------------------------------------------------------------------------------------------------------------------------------------------------------------------------------------------------------------------------------------------------------------------------------------------------------------------------------------------------------------------------------|

Confidential

**Table 4: Recommendations generated by participants**

| Recommendation                                              | Illustrative Quotations                                                                                                                                                                                                                                                                                                                                                                                                                                                           |
|-------------------------------------------------------------|-----------------------------------------------------------------------------------------------------------------------------------------------------------------------------------------------------------------------------------------------------------------------------------------------------------------------------------------------------------------------------------------------------------------------------------------------------------------------------------|
| Adopt a non-judgmental approach to working with sex workers | So it's just really about education and just, not judging a book by its cover, and I think that'll make the girls feel a lot more open. Like if they know ... there's so many different reasons I could be doing it [sex work], and they're not going to judge me, they're just going to help me. (Focus Group 1)                                                                                                                                                                 |
| Become familiar with the social realities of sex work       | I think what I would like to see from a medical institutional framework or standpoint would be an understanding of the social context of sex work. So I would like to see an institution come out and say, we understand that sex workers want decriminalization, that sex workers deserve rights, and labour rights, and human rights, that are lacking at this time. So I would like to see an explicit kind of support of that from an institution that I go to. (Interview 3) |
| Make your work place accessible for sex workers             | [Local sexual health clinic] is great but is hard to get to if I'm not downtown. [Local public health] clinics don't have the greatest times and are often full. (Survey respondent)                                                                                                                                                                                                                                                                                              |
| Provide appropriate services                                | A sexual health clinic insisted I must be having unprotected sex when I stated I was not, and tried to convince me to leave the industry because I seemed tired and stressed (I'm a student, of course I seem tired and stressed). (Survey respondent)                                                                                                                                                                                                                            |
| Publicly voice your position on sex work                    | I want to know from the get go, with the doctor, that they were sex positive and they were sex work positive...I don't need someone that doesn't get it, or that's really conservative in their mindset. (Interview 2)                                                                                                                                                                                                                                                            |



1  
2  
3  
4  
5  
6  
7  
8  
9  
10  
11  
12  
13  
14  
15  
16  
17  
18  
19  
20  
21  
22  
23  
24  
25  
26  
27  
28  
29  
30  
31  
32  
33  
34  
35  
36  
37  
38  
39  
40  
41  
42  
43  
44  
45  
46  
47

|                                                              |                                                                                                                                                                                                                                                                                                                                                                                                                                                                                                                                                                                                                                                                                                                                                                                                                                                                                                                                                             |
|--------------------------------------------------------------|-------------------------------------------------------------------------------------------------------------------------------------------------------------------------------------------------------------------------------------------------------------------------------------------------------------------------------------------------------------------------------------------------------------------------------------------------------------------------------------------------------------------------------------------------------------------------------------------------------------------------------------------------------------------------------------------------------------------------------------------------------------------------------------------------------------------------------------------------------------------------------------------------------------------------------------------------------------|
| <p>Recruit staff and volunteers with sex work experience</p> | <p>Survey question: What are your sources of strength and resilience:</p> <p>Respondent: Being around others working in this industry.</p>                                                                                                                                                                                                                                                                                                                                                                                                                                                                                                                                                                                                                                                                                                                                                                                                                  |
| <p>Understand the diversity of sex work experiences</p>      | <p>knowing that people in this industry are literally from all walks of life. Some girls are doing it for survival. Some girls are doing it to get through school. Some girls are doing it because they're into sex, you know? Like I have one girl that I used to work with and her dad worked in the parliament buildings. Like she didn't need to be working, she just loved to work. That was her thing. And she went to U of T, and it was just her extra money, like she was, that's what she liked to do, and there was nothing wrong with that. So just knowing that like, we're not all like, damaged, and cause I think a lot of people think, oh my gosh if I tell the doctor this, they're gonna think I have daddy issues, or I've been - something's happened to me, traumatic, that this is why I'm here. It's not always like that. It's, like, you could just be going through school, and it's helpful. Right?</p> <p>(Focus Group 1)</p> |
